# Supplementary material for: Preservative effect of Chinese cabbage (Brassica rapa subsp. pekinensis) extract on their molecular docking, antioxidant and antimicrobial properties
Source: PubMed Central journal article supplement (PMC6169867; doi:10.1371/journal.pone.0203306), 2018-10-03
Supplement: pone.0203306.s001.pdf [file pone.0203306.s001.pdf]

**S1 Table Antimicrobial activity of the standard antibiotics against the test microorganisms**

| Classes of antibiotics                                | Antibiotics (30 $\mu\text{g.mL}^{-1}$ ) | Zone of inhibition (mm)       |                               |                               |                                |
|-------------------------------------------------------|-----------------------------------------|-------------------------------|-------------------------------|-------------------------------|--------------------------------|
|                                                       |                                         | 494 (Isolate)                 | ATCC 43894                    | ATCC 35150                    | ATCC 13150                     |
| Cell wall Targeting Antibiotic (A)                    | Ampicillin                              | 20.00 $\pm$ 0.01 <sup>a</sup> | 20.00 $\pm$ 0.03 <sup>a</sup> | 20.00 $\pm$ 0.05 <sup>a</sup> | 14.00 $\pm$ 0.02 <sup>b</sup>  |
|                                                       | Vancomycin                              | -                             | -                             | -                             | 14.00 $\pm$ 0.02 <sup>a</sup>  |
|                                                       | Penicillin                              | 15.00 $\pm$ 0.02 <sup>a</sup> | 15.00 $\pm$ 0.05 <sup>a</sup> | 15.00 $\pm$ 0.01 <sup>a</sup> | 14.00 $\pm$ 0.04 <sup>ab</sup> |
| Protein synthesis inhibiting Targeting Antibiotic (B) | Gentamicin                              | 13.00 $\pm$ 0.05 <sup>c</sup> | 17.00 $\pm$ 0.03 <sup>a</sup> | 15.00 $\pm$ 0.04 <sup>b</sup> | 17.00 $\pm$ 0.05 <sup>a</sup>  |
|                                                       | Tetracycline                            | 16.00 $\pm$ 0.01 <sup>d</sup> | 19.00 $\pm$ 0.03 <sup>b</sup> | 20.00 $\pm$ 0.05 <sup>b</sup> | 23.00 $\pm$ 0.05 <sup>a</sup>  |
|                                                       | kanamycin                               | 20.00 $\pm$ 0.02 <sup>a</sup> | 20.00 $\pm$ 0.05 <sup>a</sup> | 17.00 $\pm$ 0.04 <sup>b</sup> | 16.00 $\pm$ 0.04 <sup>c</sup>  |
|                                                       | Clindamycin                             | -                             | -                             | 12.00 $\pm$ 0.03 <sup>b</sup> | 25.00 $\pm$ 0.05 <sup>a</sup>  |
|                                                       | Erythromycin                            | -                             | -                             | -                             | 13.00 $\pm$ 0.06 <sup>a</sup>  |
| Nucleic Acid targeting Antibiotic (C)                 | Novobiocin                              | 10.00 $\pm$ 0.05 <sup>b</sup> | 10.00 $\pm$ 0.03 <sup>b</sup> | -                             | 25.00 $\pm$ 0.04 <sup>a</sup>  |

-: not active, <sup>a</sup>: more sensitive, <sup>b</sup>: moderate sensitive, <sup>c</sup>: less sensitive, Media – Tryptic soy agar.
