# Supplementary material for: Preservative effect of Chinese cabbage (Brassica rapa subsp. pekinensis) extract on their molecular docking, antioxidant and antimicrobial properties
Source: PubMed Central journal article supplement (PMC6169867; doi:10.1371/journal.pone.0203306), 2018-10-03
Supplement: pone.0203306.s002.pdf [file pone.0203306.s002.pdf]

**S2 Table Effect of the standard chemical preservatives against the microorganisms used in this study**

| List of microorganisms        | Zone of inhibition (mm)   |                           |                 |     |                |    |
|-------------------------------|---------------------------|---------------------------|-----------------|-----|----------------|----|
|                               | Sodium metabisulfite      |                           | Sodium benzoate |     | Sodium nitrite |    |
|                               | 1 %                       | 5 %                       | 1 %             | 5 % | 1 %            | 5% |
| <b>Gram-negative bacteria</b> |                           |                           |                 |     |                |    |
| 494 (Isolate)                 | 09.00 ± 0.03 <sup>b</sup> | 11.00 ± 0.05 <sup>a</sup> | -               | -   | -              | -  |
| ATCC 35150                    | 10.00 ± 0.02 <sup>b</sup> | 13.00 ± 0.05 <sup>a</sup> | -               | -   | -              | -  |
| ATCC 43894                    | 11.00 ± 0.03 <sup>b</sup> | 13.00± 0.03 <sup>a</sup>  | -               | -   | -              | -  |
| <b>Gram-positive bacteria</b> |                           |                           |                 |     |                |    |
| ATCC 13150                    | 11.00 ± 0.01 <sup>a</sup> | 11.00 ± 0.04 <sup>a</sup> | -               | -   | -              | -  |
| KCTC 21004                    | 10.00 ± 0.04 <sup>a</sup> | 10.00 ± 0.03 <sup>a</sup> | -               | -   | -              | -  |
| KCTC 3545                     | 10.00 ± 0.02 <sup>a</sup> | 11.00 ± 0.03 <sup>a</sup> | -               | -   | -              | -  |
| KCTC 13302                    | 10.00 ± 0.05 <sup>a</sup> | 10.00± 0.03 <sup>a</sup>  | -               | -   | -              | -  |
| <b>Fungi</b>                  |                           |                           |                 |     |                |    |
| KCTC 7965                     | -                         | -                         | -               | -   | -              | -  |
| KCTC 6145                     | 10.00 ± 0.03 <sup>a</sup> | 10.00 ± 0.03 <sup>a</sup> | -               | -   | -              | -  |
| KCTC 6143                     | 10.00 ± 0.05 <sup>a</sup> | 10.00 ± 0.04 <sup>a</sup> | -               | -   | -              | -  |
| KCTC 6317                     | 10.00 ± 0.01 <sup>a</sup> | 10.00 ± 0.03 <sup>a</sup> | -               | -   | -              | -  |

-: not active, <sup>a</sup>: more sensitive, <sup>b</sup>: moderate sensitive, <sup>c</sup>: less sensitive, Media – Tryptic soy agar.
