# Supplementary material for: Preservative effect of Chinese cabbage (Brassica rapa subsp. pekinensis) extract on their molecular docking, antioxidant and antimicrobial properties
Source: PubMed Central journal article supplement (PMC6169867; doi:10.1371/journal.pone.0203306), 2018-10-03
Supplement: pone.0203306.s003.pdf [file pone.0203306.s003.pdf]

**S3 Table Zone of inhibition for pancreatic enzyme treatment**

| List of microorganisms        | Zone of inhibition (mm)   |                            |                            |                            |     |    |     |
|-------------------------------|---------------------------|----------------------------|----------------------------|----------------------------|-----|----|-----|
|                               | CE                        | TE                         | DE                         | EEE                        | EtE | ME | DWE |
| <b>Gram-negative bacteria</b> |                           |                            |                            |                            |     |    |     |
| 494 (Isolate)                 | 13.00 ± 0.01 <sup>a</sup> | 12.00 ± 0.03 <sup>bc</sup> | 12.30 ± 0.05 <sup>b</sup>  | 12.30 ± 0.05 <sup>b</sup>  | -   | -  | -   |
| ATCC 35150                    | 13.00 ± 0.03 <sup>a</sup> | 12.00 ± 0.05 <sup>b</sup>  | 12.00 ± 0.01 <sup>b</sup>  | 13.00 ± 0.04 <sup>a</sup>  | -   | -  | -   |
| ATCC 43894                    | 13.00 ± 0.02 <sup>a</sup> | -                          | 12.00 ± 0.05 <sup>b</sup>  | 11.00 ± 0.03 <sup>c</sup>  | -   | -  | -   |
| <b>Gram-positive bacteria</b> |                           |                            |                            |                            |     |    |     |
| ATCC 13150                    | 10.00 ± 0.01 <sup>b</sup> | 12.00 ± 0.05 <sup>a</sup>  | 10.00 ± 0.03 <sup>b</sup>  | 10.00 ± 0.04 <sup>b</sup>  | -   | -  | -   |
| KCTC 21004                    | 10.00 ± 0.03 <sup>a</sup> | -                          | 10.00 ± 0.05 <sup>a</sup>  | 09.30 ± 0.03 <sup>b</sup>  | -   | -  | -   |
| KCTC 3545                     | 11.00 ± 0.02 <sup>a</sup> | -                          | 11.00 ± 0.03 <sup>a</sup>  | 10.00 ± 0.05 <sup>b</sup>  | -   | -  | -   |
| KCTC 13302                    | 10.00 ± 0.02 <sup>a</sup> | -                          | 09.00 ± 0.04 <sup>b</sup>  | 10.00 ± 0.05 <sup>a</sup>  | -   | -  | -   |
| <b>Fungi</b>                  |                           |                            |                            |                            |     |    |     |
| KCTC 7965                     | 10.30 ± 0.03 <sup>a</sup> | -                          | 10.00 ± 0.05 <sup>ab</sup> | 10.30 ± 0.05 <sup>a</sup>  | -   | -  | -   |
| KCTC 6145                     | 08.80 ± 0.01 <sup>a</sup> | -                          | 08.30 ± 0.03 <sup>ab</sup> | 08.50 ± 0.03 <sup>ab</sup> | -   | -  | -   |
| KCTC 6143                     | -                         | -                          | -                          | -                          | -   | -  | -   |
| KCTC 6317                     | 12.50 ± 0.03 <sup>a</sup> | -                          | 11.50 ± 0.05 <sup>b</sup>  | 11.60 ± 0.03 <sup>b</sup>  | -   | -  | -   |

-: not active, CE: Chloroform Extract, TE: Toluene Extract, DE: Dichloromethane Extract, EEE: Ethyl Ether Extract, EtE: Ethanol Extract, ME: Methanol Extract, DWE: Distilled Water Extract

<sup>a</sup>: more sensitive, <sup>b</sup>: moderate sensitive, <sup>c</sup>: less sensitive, Media – Tryptic soy Broth.
