# Supplementary material for: Preservative effect of Chinese cabbage (Brassica rapa subsp. pekinensis) extract on their molecular docking, antioxidant and antimicrobial properties
Source: PubMed Central journal article supplement (PMC6169867; doi:10.1371/journal.pone.0203306), 2018-10-03
Supplement: pone.0203306.s004.pdf [file pone.0203306.s004.pdf]

**S4 Table Qualitative phytochemical analysis of the leaf and stem extract of BRARP**

| <b>Sr. No</b> | <b>Phytocompound</b> | <b>CE</b> | <b>DE</b> | <b>EEE</b> | <b>TE</b> | <b>EtE</b> | <b>ME</b> | <b>DWE</b> |
|---------------|----------------------|-----------|-----------|------------|-----------|------------|-----------|------------|
| 1             | Phenol               | -         | -         | -          | -         | -          | -         | -          |
| 2             | Saponin              | +         | +         | -          | -         | -          | -         | -          |
| 3             | Glycosides           | +         | +         | +          | +         | -          | -         | -          |
| 4             | Steroids             | -         | -         | +          | +         | -          | -         | -          |
| 5             | Terpenoids           | -         | -         | -          | -         | -          | -         | -          |
| 6             | Tanins               | -         | -         | -          | -         | -          | -         | -          |
| 7             | Flavonoid            | +         | +         | +          | +         | -          | -         | -          |

-: not present, +: present, CE: Chloroform Extract, TE: Toluene Extract, DE: Dichloromethane Extract, EEE: Ethyl Ether Extract, EtE: Ethanol Extract, ME: Methanol Extract, DWE: Distilled Water Extract
