# Supplementary material for: Preservative effect of Chinese cabbage (Brassica rapa subsp. pekinensis) extract on their molecular docking, antioxidant and antimicrobial properties
Source: PubMed Central journal article supplement (PMC6169867; doi:10.1371/journal.pone.0203306), 2018-10-03
Supplement: pone.0203306.s005.pdf [file pone.0203306.s005.pdf]

**S5 Table Antimicrobial effect of the compounds present in BRARP extract**

| List of microorganisms        | Zone of inhibition (mm)          |                         |                         |                         |                         |                         |
|-------------------------------|----------------------------------|-------------------------|-------------------------|-------------------------|-------------------------|-------------------------|
|                               | (E)-2-Butenoic acid propyl ester |                         | Phenol                  |                         | Sodium phenoxide        |                         |
|                               | 0.5 mg.mL <sup>-1</sup>          | 1.0 mg.mL <sup>-1</sup> | 0.5 mg.mL <sup>-1</sup> | 1.0 mg.mL <sup>-1</sup> | 0.5 mg.mL <sup>-1</sup> | 1.0 mg.mL <sup>-1</sup> |
| <b>Gram-negative bacteria</b> |                                  |                         |                         |                         |                         |                         |
| 494 (Isolate)                 | -                                | -                       | -                       | -                       | -                       | -                       |
| ATCC 35150                    | -                                | -                       | -                       | -                       | -                       | -                       |
| ATCC 43894                    | -                                | -                       | -                       | -                       | -                       | -                       |
| <b>Gram-positive bacteria</b> |                                  |                         |                         |                         |                         |                         |
| ATCC 13150                    | -                                | -                       | -                       | -                       | -                       | -                       |
| KCTC 21004                    | -                                | -                       | -                       | -                       | -                       | -                       |
| KCTC 3545                     | -                                | -                       | -                       | -                       | -                       | -                       |
| KCTC 13302                    | -                                | -                       | -                       | -                       | -                       | -                       |
| <b>Fungi</b>                  |                                  |                         |                         |                         |                         |                         |
| KCTC 7965                     | -                                | -                       | -                       | -                       | -                       | -                       |
| KCTC 6145                     | -                                | -                       | -                       | -                       | -                       | -                       |
| KCTC 6143                     | -                                | -                       | -                       | -                       | -                       | -                       |
| KCTC 6317                     | -                                | -                       | -                       | -                       | -                       | -                       |

| List of microorganisms        | Zone of inhibition (mm)   |                         |                                              |                           |                              |                           |
|-------------------------------|---------------------------|-------------------------|----------------------------------------------|---------------------------|------------------------------|---------------------------|
|                               | 4-Pyridinecarboxylic acid |                         | 1,2-Benzenedicarboxylic acid (Phthalic acid) |                           | s-Triazolo[4, 3-a]pyridazine |                           |
|                               | 0.5 mg.mL <sup>-1</sup>   | 1.0 mg.mL <sup>-1</sup> | 0.5 mg.mL <sup>-1</sup>                      | 1.0 mg.mL <sup>-1</sup>   | 0.5 mg.mL <sup>-1</sup>      | 1.0 mg.mL <sup>-1</sup>   |
| <b>Gram-negative bacteria</b> |                           |                         |                                              |                           |                              |                           |
| 494 (Isolate)                 | -                         | -                       | 09.00 ± 0.03 <sup>b</sup>                    | 15.00 ± 0.01 <sup>a</sup> | 09.00 ± 0.03 <sup>b</sup>    | 11.00 ± 0.05 <sup>a</sup> |
| ATCC 35150                    | -                         | -                       | 10.00 ± 0.02 <sup>b</sup>                    | 15.00 ± 0.04 <sup>b</sup> | -                            | -                         |
| ATCC 43894                    | -                         | -                       | 11.00 ± 0.03 <sup>b</sup>                    | 20.00 ± 0.05 <sup>b</sup> | -                            | -                         |
| <b>Gram-positive bacteria</b> |                           |                         |                                              |                           |                              |                           |
| ATCC 13150                    | -                         | -                       | 11.00 ± 0.01 <sup>a</sup>                    | 15.00 ± 0.05 <sup>a</sup> | -                            | -                         |
| KCTC 21004                    | -                         | -                       | 10.00 ± 0.04 <sup>a</sup>                    | 17.00 ± 0.03 <sup>a</sup> | 11.00 ± 0.01 <sup>a</sup>    | 11.00 ± 0.04 <sup>a</sup> |
| KCTC 3545                     | -                         | -                       | 10.00 ± 0.02 <sup>a</sup>                    | 19.00 ± 0.03 <sup>b</sup> | 10.00 ± 0.04 <sup>a</sup>    | 10.00 ± 0.03 <sup>a</sup> |
| KCTC 13302                    | -                         | -                       | 10.00 ± 0.05 <sup>a</sup>                    | 20.00 ± 0.05 <sup>a</sup> |                              |                           |
| <b>Fungi</b>                  |                           |                         |                                              |                           |                              |                           |
| KCTC 7965                     | -                         | -                       | 11.00 ± 0.01 <sup>a</sup>                    | 11.00 ± 0.05 <sup>a</sup> | -                            | -                         |
| KCTC 6145                     | -                         | -                       | 10.00 ± 0.04 <sup>a</sup>                    | 13.00 ± 0.05 <sup>a</sup> | -                            | -                         |
| KCTC 6143                     | -                         | -                       | 10.00 ± 0.04 <sup>a</sup>                    | 13.00 ± 0.03 <sup>a</sup> | -                            | -                         |
| KCTC 6317                     | -                         | -                       | 10.00 ± 0.03 <sup>a</sup>                    | 11.00 ± 0.05 <sup>a</sup> | -                            | -                         |

| List of microorganisms        | Zone of inhibition (mm)   |                           |                         |                         |                         |                         |
|-------------------------------|---------------------------|---------------------------|-------------------------|-------------------------|-------------------------|-------------------------|
|                               | 2,2-Dimethoxybutane       |                           | 2,3-Dicyanopropionamide |                         | DMSO                    |                         |
|                               | 0.5 mg.mL <sup>-1</sup>   | 1.0 mg.mL <sup>-1</sup>   | 0.5 mg.mL <sup>-1</sup> | 1.0 mg.mL <sup>-1</sup> | 0.5 mg.mL <sup>-1</sup> | 1.0 mg.mL <sup>-1</sup> |
| <b>Gram-negative bacteria</b> |                           |                           |                         |                         |                         |                         |
| 494 (Isolate)                 | 09.00 ± 0.03 <sup>b</sup> | 11.00 ± 0.05 <sup>a</sup> | -                       | -                       | -                       | -                       |
| ATCC 35150                    | 10.00 ± 0.02 <sup>b</sup> | 13.00 ± 0.05 <sup>a</sup> | -                       | -                       | -                       | -                       |
| ATCC 43894                    |                           |                           | -                       | -                       | -                       | -                       |
| <b>Gram-positive bacteria</b> |                           |                           |                         |                         |                         |                         |
| ATCC 13150                    | -                         | -                         | -                       | -                       | -                       | -                       |
| KCTC 21004                    | -                         | -                         | -                       | -                       | -                       | -                       |
| KCTC 3545                     | -                         | -                         | -                       | -                       | -                       | -                       |
| KCTC 13302                    | 10.00 ± 0.05 <sup>a</sup> | 10.00 ± 0.03 <sup>a</sup> | -                       | -                       | -                       | -                       |
| <b>Fungi</b>                  |                           |                           |                         |                         |                         |                         |
| KCTC 7965                     | -                         | -                         | -                       | -                       | -                       | -                       |
| KCTC 6145                     | -                         | -                         | -                       | -                       | -                       | -                       |
| KCTC 6143                     | -                         | -                         | -                       | -                       | -                       | -                       |
| KCTC 6317                     | -                         | -                         | -                       | -                       | -                       | -                       |

-: not active, <sup>a</sup>: more sensitive, <sup>b</sup>: moderate sensitive, <sup>c</sup>: less sensitive, Media – Tryptic soy agar.
