# Supplementary material for: Preservative effect of Chinese cabbage (Brassica rapa subsp. pekinensis) extract on their molecular docking, antioxidant and antimicrobial properties
Source: PubMed Central journal article supplement (PMC6169867; doi:10.1371/journal.pone.0203306), 2018-10-03
Supplement: pone.0203306.s006.pdf [file pone.0203306.s006.pdf]

1 **S6 Table. Cytotoxic activity of standard compounds present in BRARP from South Korea**  
 2 **against MCF -7 cell lines**

3

| Sr. No | Standard chemical Compound Identified<br>in BRARP | IC <sub>50</sub> (µg.mL <sup>-1</sup> ) | IC <sub>50</sub> (µg.mL <sup>-1</sup> ) |
|--------|---------------------------------------------------|-----------------------------------------|-----------------------------------------|
|        |                                                   | MCF-7<br>24h                            | MCF-7<br>48h                            |
| 1      | (E)-2-Butenoic acid propyl ester                  | >50                                     | >50                                     |
| 2      | Phenol                                            | >50                                     | >50                                     |
| 3      | Sodium phenoxide                                  | >50                                     | >50                                     |
| 4      | 4-Pyridinecarboxylic acid                         | >50                                     | >50                                     |
| 5      | s-Triazolo[4,3-a]pyridine                         | >50                                     | >50                                     |
| 6      | 1,2-Benzenedicarboxylic acid (Phthalic acid)      | >50                                     | 44.3 ± 1.1                              |
| 7      | 2,2-Dimethoxybutane                               | >50                                     | >50                                     |
| 8      | 2,3-Dicyanopropionamide                           | >50                                     | 41 ± 1.7                                |

4

5 -: IC<sub>50</sub> (inhibitory concentration 50 %), MCF: Michigan Cancer Foundation-7 (Brest cancer cell  
 6 line)

7

| Name the compound                            | Chemical formula                               | Catalog Number                   | Company           | Cytotoxic effect |
|----------------------------------------------|------------------------------------------------|----------------------------------|-------------------|------------------|
| <b>Chloroform extract</b>                    |                                                |                                  |                   |                  |
| (E)-2-Butenoic acid propyl ester             | C <sub>7</sub> H <sub>12</sub> O <sub>2</sub>  | 751162<br>CAS# 2210-28-8         | Sigma-Aldrich     | NCT              |
| Phenol                                       | C <sub>6</sub> H <sub>6</sub> O                | P1037<br>CAS# 108-95-2           | Sigma-Aldrich     | NCT              |
| Sodium phenoxide                             | C <sub>6</sub> H <sub>5</sub> NaO              | CDS001581<br>CAS# 139-02-6       | Sigma-Aldrich     | NCT              |
| 4-Pyridinecarboxylic acid                    | C <sub>6</sub> H <sub>5</sub> NO <sub>2</sub>  | 8.00736<br>CAS# 55-22-1          | Sigma-Aldrich     | NCT              |
| s-Triazolo[4,3-a]pyridine                    | C <sub>6</sub> H <sub>5</sub> N <sub>3</sub>   | CAS# 069872                      | Matrix Scientific | NCT              |
| 1,2-Benzenedicarboxylic acid (Phthalic acid) | C <sub>8</sub> H <sub>6</sub> O <sub>4</sub>   | 79255<br>CAS# 88-99-3            | Sigma-Aldrich     | MCT              |
| <b>Methanol extract</b>                      |                                                |                                  |                   |                  |
| 2,2-Dimethoxybutane                          | C <sub>6</sub> H <sub>14</sub> O <sub>2</sub>  | Catalog#125785<br>CAS# 3453-99-4 | Matrix science    | NT               |
| 2,3-Dicyanopropionamide                      | C <sub>5</sub> H <sub>5</sub> N <sub>3</sub> O | 40751<br>CAS# 98-96-4            | Sigma-Aldrich     | MCT              |

8

9 -: NCT - Non cytotoxic; MCT – Moderate cytotoxic effect
