# Supplementary material for: Preservative effect of Chinese cabbage (Brassica rapa subsp. pekinensis) extract on their molecular docking, antioxidant and antimicrobial properties
Source: PubMed Central journal article supplement (PMC6169867; doi:10.1371/journal.pone.0203306), 2018-10-03
Supplement: pone.0203306.s008.pdf [file pone.0203306.s008.pdf]

# Chinese cabbage chloroform extract

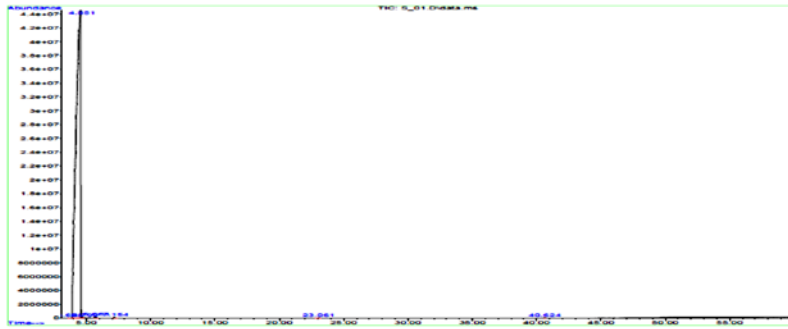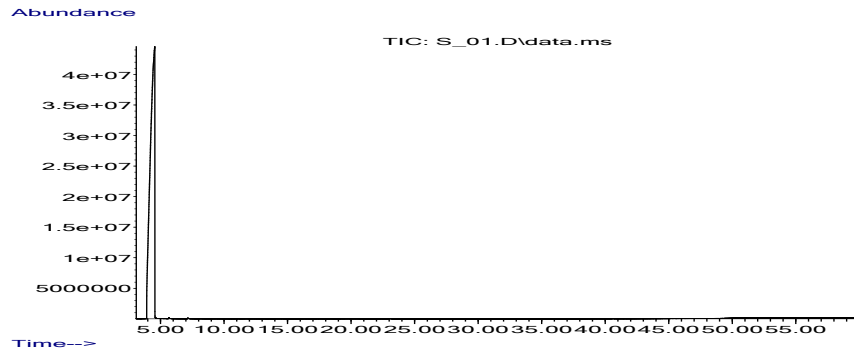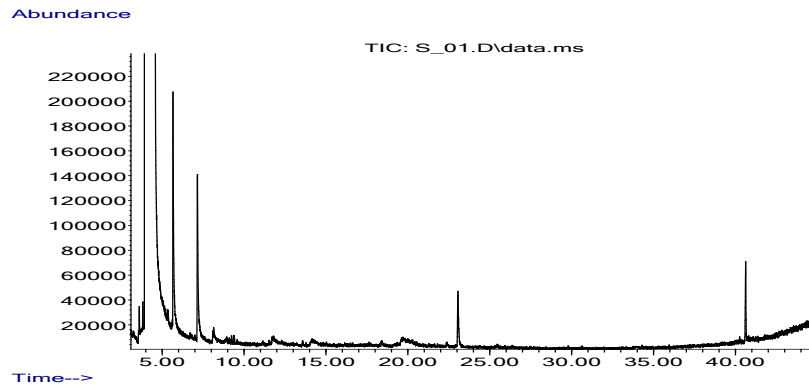

| Peak | R.T time | Type | Width | Area      | Start time | End time |
|------|----------|------|-------|-----------|------------|----------|
| 1    | 3.605    | VV   | 0.027 | 425422    | 3.578      | 3.654    |
| 2    | 4.551    | PV   | 0.288 | 1.079E+10 | 3.86       | 4.781    |
| 3    | 4.792    | VV   | 0.023 | 117303    | 4.781      | 4.816    |
| 4    | 5.663    | VV   | 0.045 | 6097082   | 5.637      | 5.937    |
| 5    | 7.154    | PV   | 0.05  | 5035212   | 7.105      | 7.387    |
| 6    | 23.061   | BV   | 0.054 | 1823455   | 22.845     | 23.221   |
| 7    | 40.624   | BV   | 0.034 | 1588487   | 40.535     | 40.688   |

Library report - C:\Database\W8N05ST.L

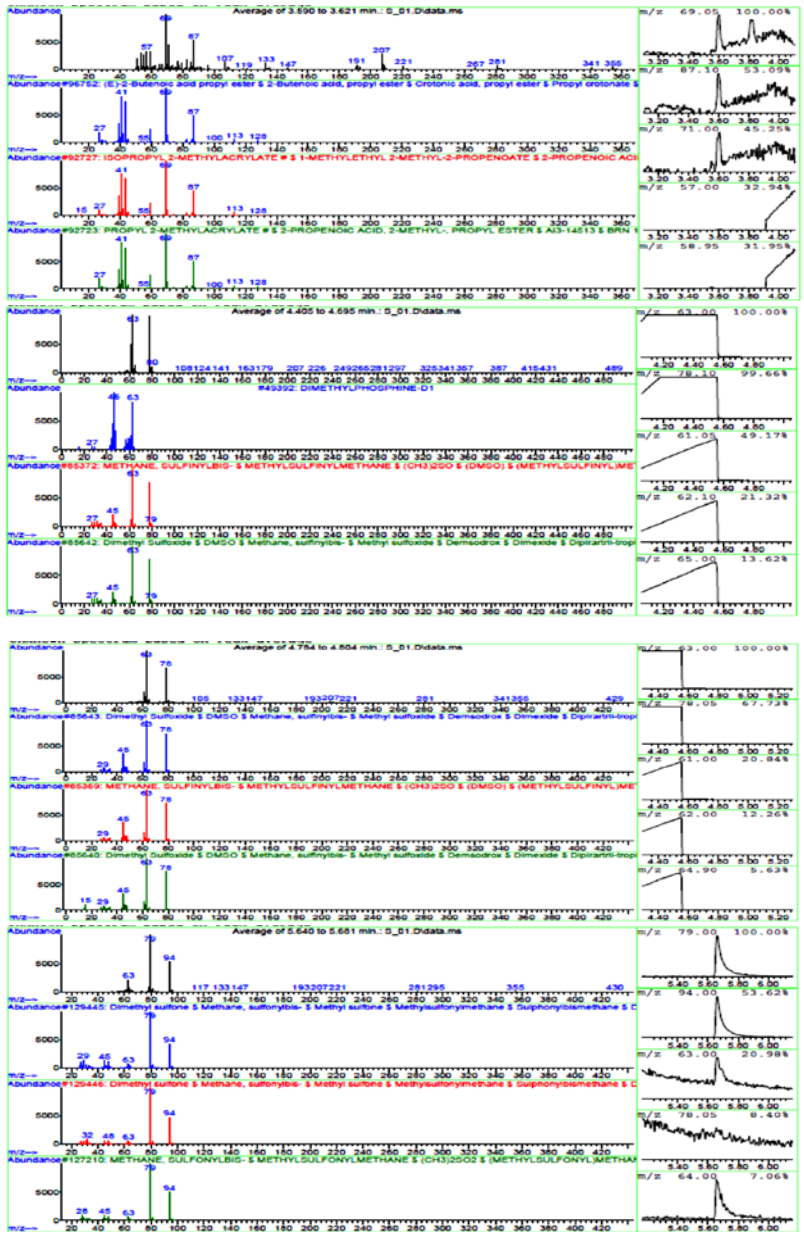

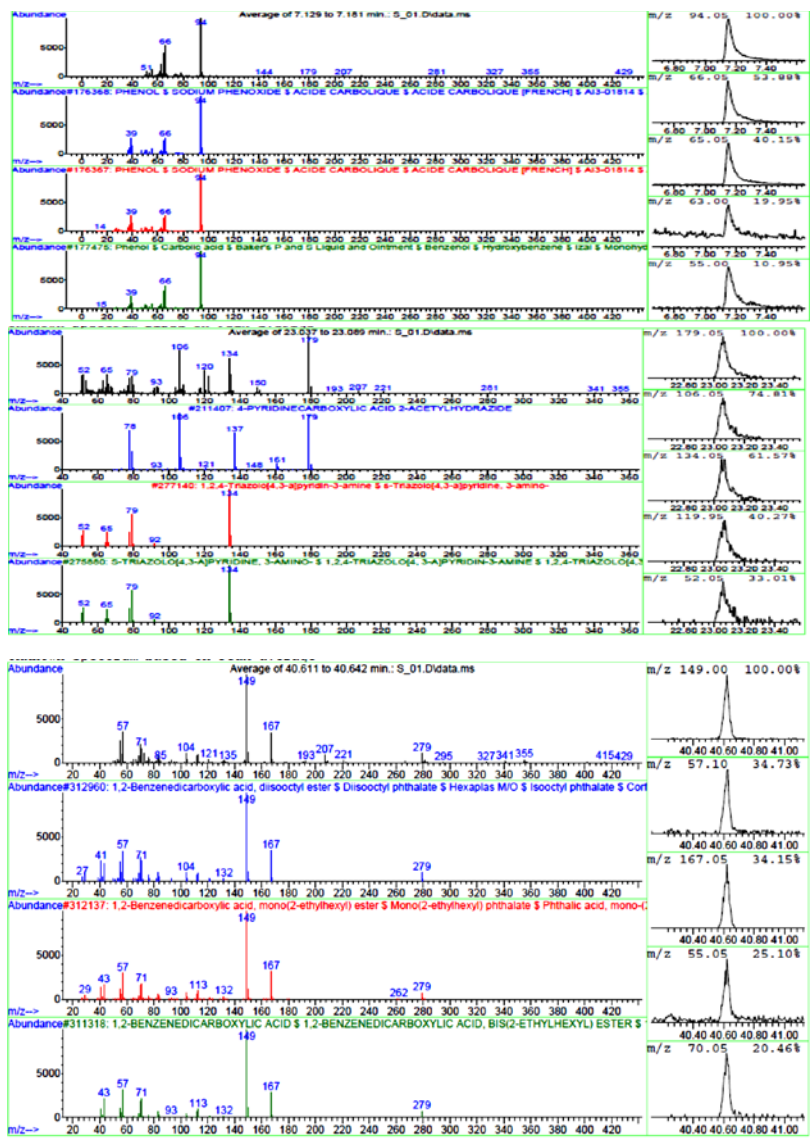

S2 Fig. GC-MS chromatogram of BRARP extract in chloroform
