# Supplementary material for: Preservative effect of Chinese cabbage (Brassica rapa subsp. pekinensis) extract on their molecular docking, antioxidant and antimicrobial properties
Source: PubMed Central journal article supplement (PMC6169867; doi:10.1371/journal.pone.0203306), 2018-10-03
Supplement: pone.0203306.s009.pdf [file pone.0203306.s009.pdf]

# Chinese cabbage methanol extract

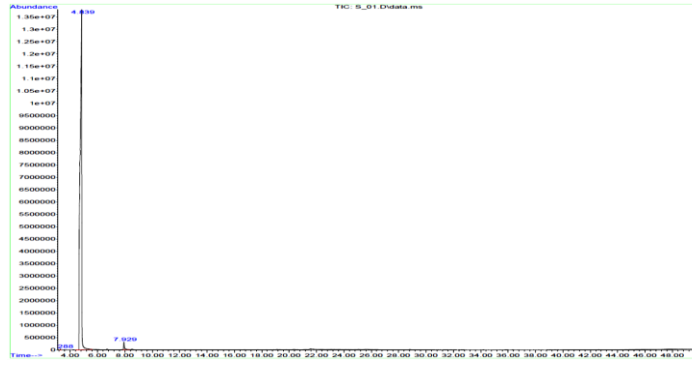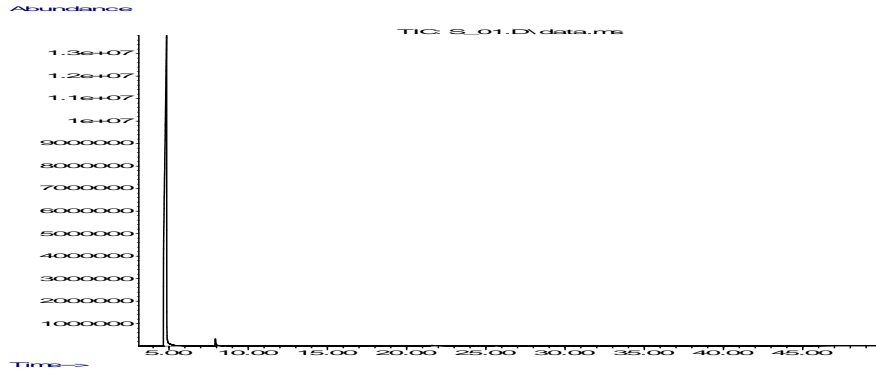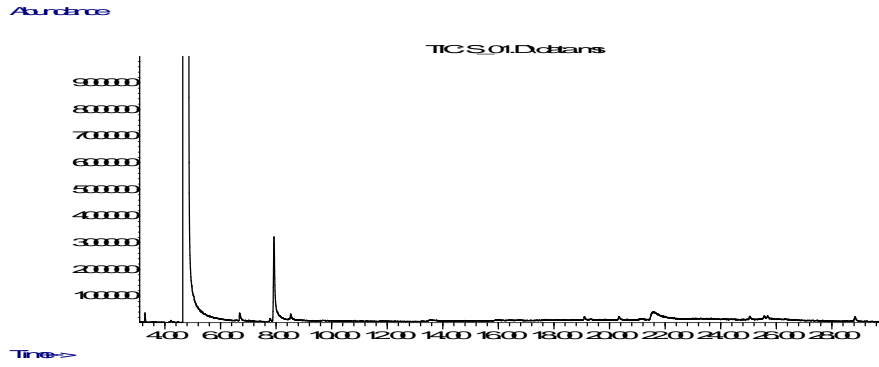

| Peak | R.T time | Type | Width | Area      | Start time | End time |
|------|----------|------|-------|-----------|------------|----------|
| 1    | 3.288    | BB   | 0.043 | 530502    | 3.247      | 3.347    |
| 2    | 4.839    | BB   | 0.111 | 1.166E+09 | 4.422      | 5.604    |
| 3    | 7.929    | PB   | 0.064 | 14000713  | 7.862      | 8.337    |

Library report - C:\Database\W8N05ST.L

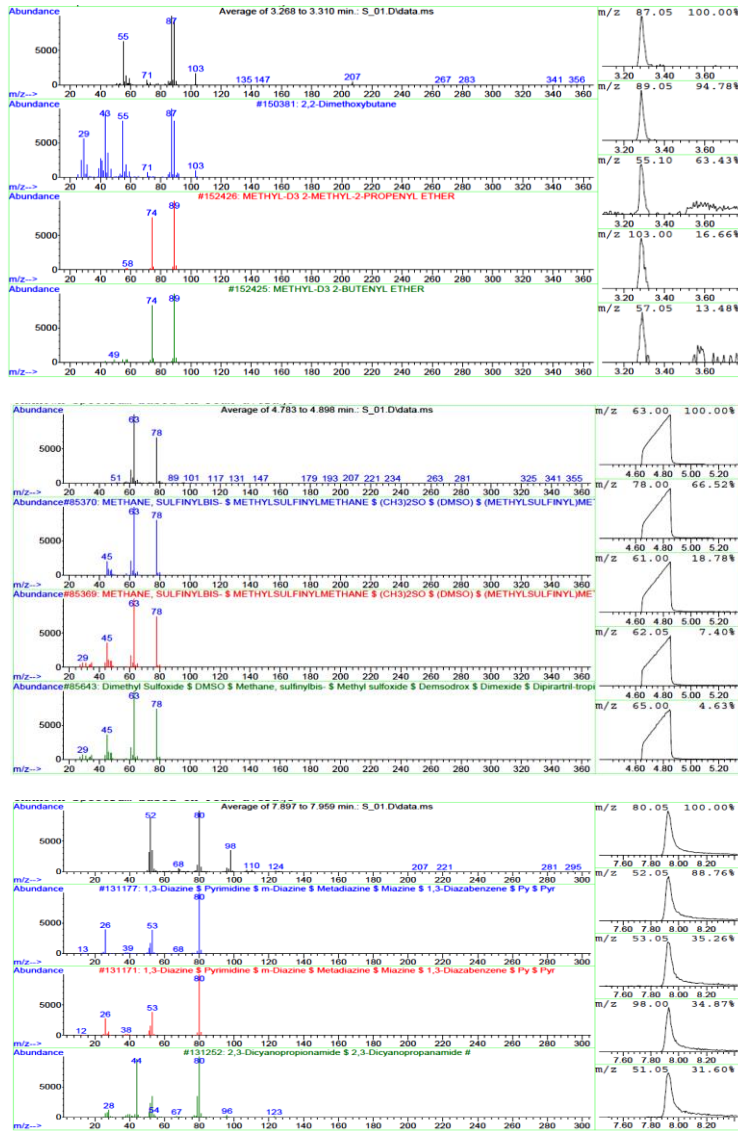

S3 Fig. GC-MS chromatogram of BRARP extract in methanol
